# Supplementary material for: A Ketogenic & Low-Protein Diet Slows Retinal Degeneration in rd10 Mice
Source: PubMed Central journal article supplement — Transl Vis Sci Technol. 2020 Oct 14;9(11):18. doi: 10.1167/tvst.9.11.18 (PMC7571290; doi:10.1167/tvst.9.11.18), 2020-10-14
Supplement: tvst-9-11-18_s001.pdf [file tvst-9-11-18_s001.pdf]

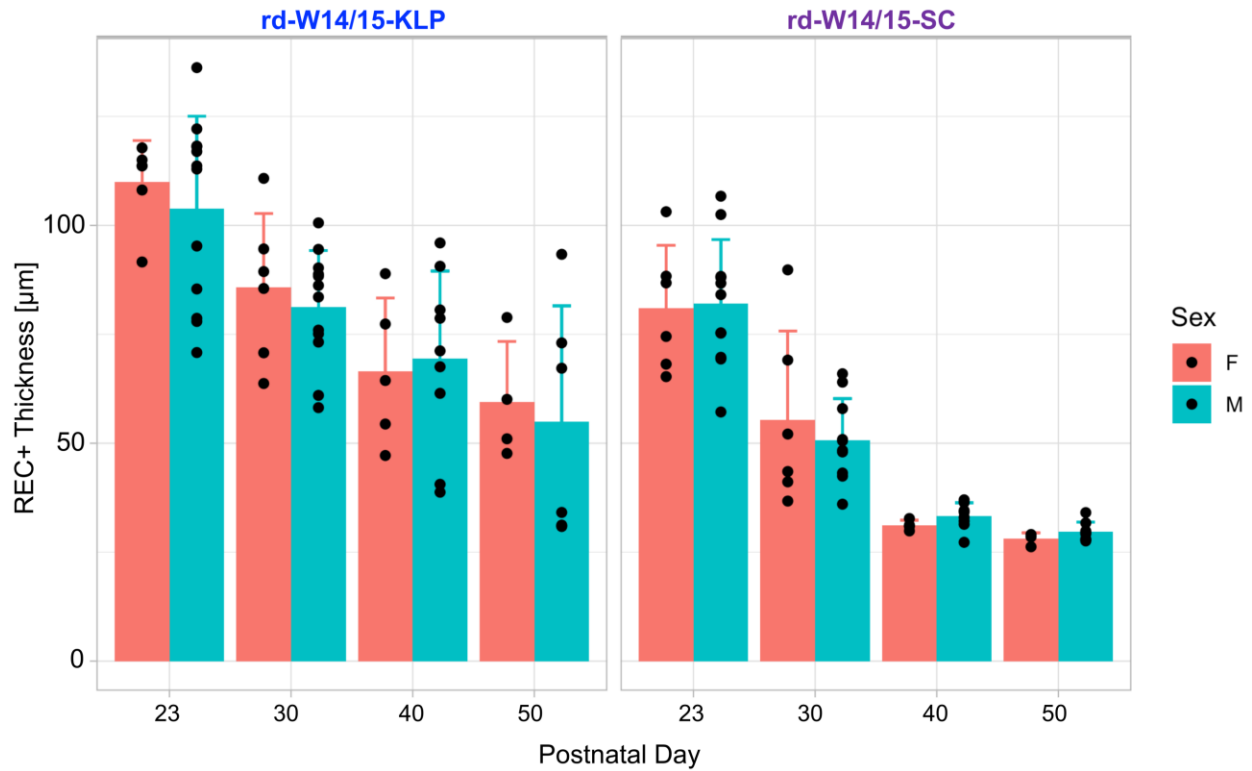

**Figure S1. There were no sex-specific effects on photoreceptor protection.** Bar graph plotting rd-W14/15-KLP and rd-W14/15-SC REC+ (photoreceptor + RPE) thickness over time separating female (F, red) and male (M, green) mice. Plots were generated using the ggplot package and statistical tests were carried out using R version 3.6.0. We investigated the potential for a sex-specific protective effect of the ketogenic & low protein diet using 3-factor ANOVA. There was no main effect of sex ( $p = 0.545$ ) and no significant interactions between independent variables.
