# Supplementary material for: A Ketogenic & Low-Protein Diet Slows Retinal Degeneration in rd10 Mice
Source: PubMed Central journal article supplement — Transl Vis Sci Technol. 2020 Oct 14;9(11):18. doi: 10.1167/tvst.9.11.18 (PMC7571290; doi:10.1167/tvst.9.11.18), 2020-10-14
Supplement: tvst-9-11-18_s003.pdf [file tvst-9-11-18_s003.pdf]

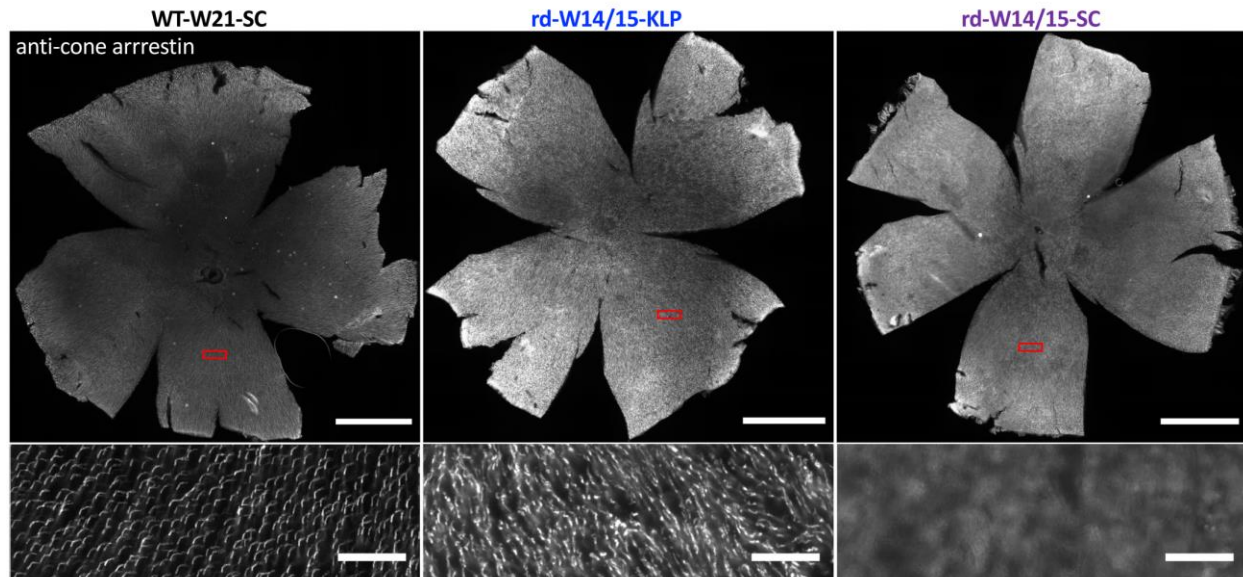

**Figure S3. Cone preservation is evident in whole mount retina from rd10 mice on the ketogenic & low protein diet.** Representative images of whole mount retinas stained with an antibody specific for cone arrestin. Red box represents approximate location of inset. Scale bar of overview = 1,000  $\mu\text{m}$ . Scale bar for inset = 50  $\mu\text{m}$ .
